# Supplementary material
Source: PubMed Central journal article supplement (PMC11105254)
Supplement: 18_2017_2658_MOESM2_ESM.pdf [file 18_2017_2658_MOESM2_ESM.pdf]

| Figure        | N WT chow | N KO chow | N WT HFD | N KO HFD |
|---------------|-----------|-----------|----------|----------|
| 2 A           | 14        | 10        | -        | -        |
| 2 B           | -         | -         | 16       | 12       |
| 2 C           | 14        | 10        | 12       | 12       |
| 2 D           | 13        | 9         | 12       | 12       |
| 2 E           | 13        | 10        | 16       | 12       |
| 2 F           | 14        | 8         | 12       | 12       |
| 2 G           | 14        | 8         | 12       | 12       |
| 2 H           | 14        | 8         | 12       | 12       |
| 3             | -         | -         | 4        | 4        |
| 4 A           | 13        | 10        | 11       | 10       |
| 4 B           | 12        | 8         | 10       | 12       |
| 4 C           | 5         | 9         | n.d.     | n.d.     |
| 4 D           | 8         | 10        | 9        | 8        |
| 4 E           | 10        | 9         | 10       | 9        |
| 4 F           | 8         | 9         | 9        | 8        |
| 5 B epiAT     | 14        | 10        | 12       | 12       |
| 5 B scAT      | 14        | 9         | 10       | 9        |
| 8 C           | -         | -         | 7        | 7        |
| 8 E total ATM | -         | -         | 7        | 8        |
| 8 E M1        | -         | -         | 7        | 8        |
| 8 E M2        | -         | -         | 7        | 8        |
| 8 E M1/M2     | -         | -         | 7        | 8        |

| Table 1        | N WT chow | N KO chow | N WT HFD | N KO HFD |
|----------------|-----------|-----------|----------|----------|
| adipoq         | 8         | 10        | 10       | 10       |
| leptin         | 10        | 10        | 10       | 10       |
| HbA1c          | 13        | 10        | 16       | 12       |
| chemerin       | -         | -         | 8        | 8        |
| FFA            | 10        | 10        | 10       | 10       |
| totalcholester | 10        | 10        | 10       | 10       |
| triglycerides  | 10        | 10        | 10       | 10       |
| glucose        | 13        | 9         | 12       | 12       |

|        | WT          |            | KO          |            |
|--------|-------------|------------|-------------|------------|
|        | primary epi | primary sc | primary epi | primary sc |
| 6 A, B | 5           | 5          | 5           | 5          |
| 6 C, D | 3 / 3       | 3 / 3      | 3 / 3       | 3 / 3      |

|                     | AT genes  | scAT     |          | epiAT    |          | BAT      |          |   |
|---------------------|-----------|----------|----------|----------|----------|----------|----------|---|
|                     |           | N WT HFD | N KO HFD | N WT HFD | N KO HFD | N WT HFD | N KO HFD |   |
| Figure 8 A, B,<br>D | TNFA      | 7        | 7        | 8        | 8        | 8        | 8        |   |
|                     | IL6       | 6        | 7        | 8        | 7        | 8        | 7        |   |
|                     | MCP1      | 6        | 8        | 7        | 8        | 8        | 7        |   |
|                     | IL1B      | 7        | 8        | 8        | 8        | 8        | 8        |   |
|                     | Tenascin  | 7        | 8        | 8        | 8        | 8        | 8        |   |
|                     | INFG      | 6        | 8        | 7        | 8        | 8        | 8        |   |
|                     | Midkine   | 4        | 2        | 5        | 6        | 7        | 4        |   |
|                     | IL10      | 6        | 8        | 8        | 8        | 8        | 8        |   |
|                     | IL4       | 6        | 7        | 7        | 7        | 8        | 8        |   |
|                     | Chemerin  | 7        | 7        | 7        | 6        | 8        | 8        |   |
|                     | vaspin    | 7        | 6        | 8        | 7        | 8        | 8        |   |
|                     | 5 C / 7 B | Pparg    | 7        | 8        | 8        | 8        | 8        | 8 |
|                     | 5 D / 7 B | Ki67     | 6        | 8        | 8        | 7        | 8        | 7 |
| 5 E / 7 B           | Klf4      | 7        | 8        | 7        | 8        | 8        | 7        |   |
| 5 F / 7 B           | Fatp4     | 7        | 8        | 8        | 8        | 8        | 8        |   |
| 5 G / 7 B           | Vaspin    | 6        | 7        | 8        | 7        | 8        | 8        |   |
| 7 C                 | UCP1      | 7        | 6        | 8        | 7        | 8        | 8        |   |
| 7 D                 | PGC1a     | 5        | 3        | 7        | 6        | 8        | 8        |   |
